# Supplementary material
Source: PubMed Central journal article supplement (PMC1189323)

(a) Native structure proton channel

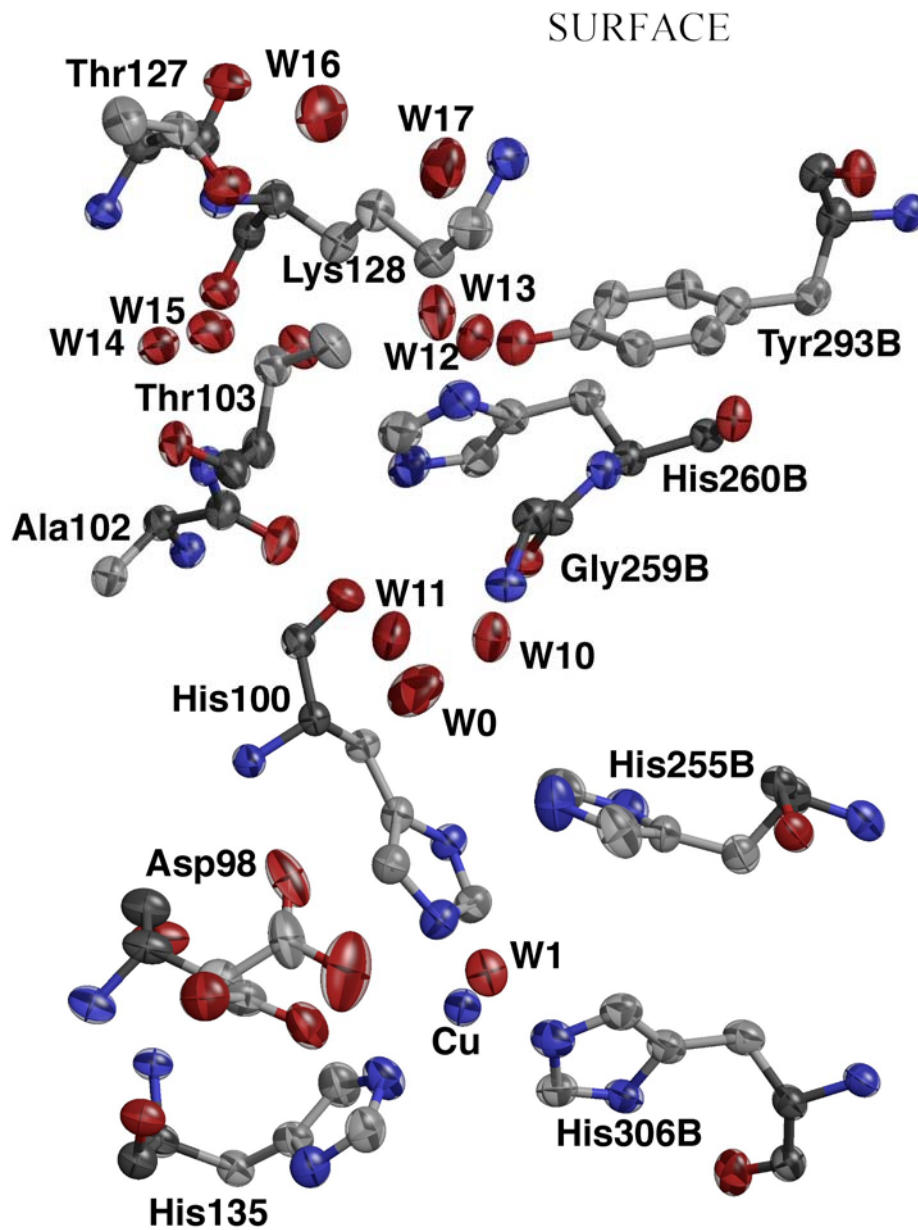

(b): NO<sub>2</sub>-soaked proton channel

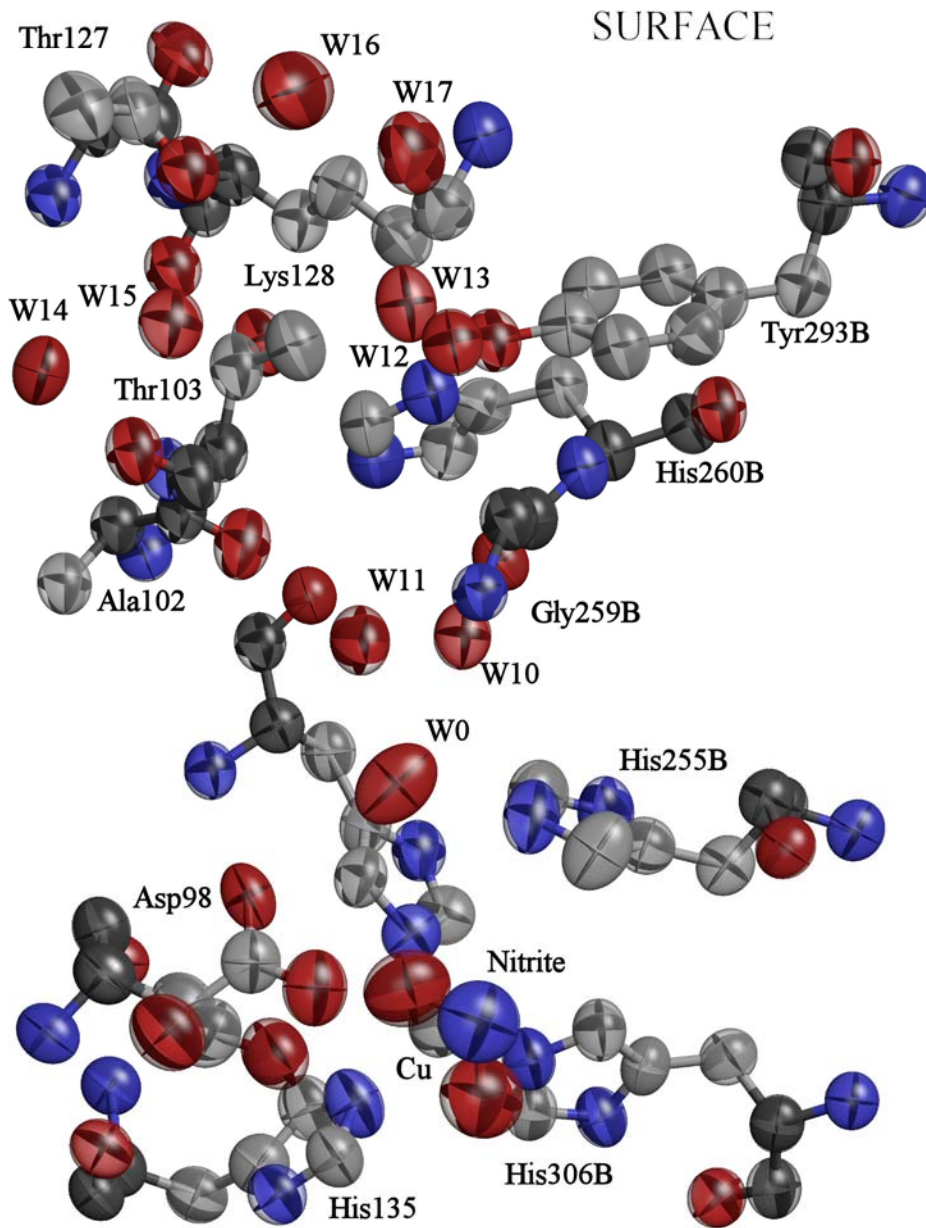

(c): NO-bound proton channel

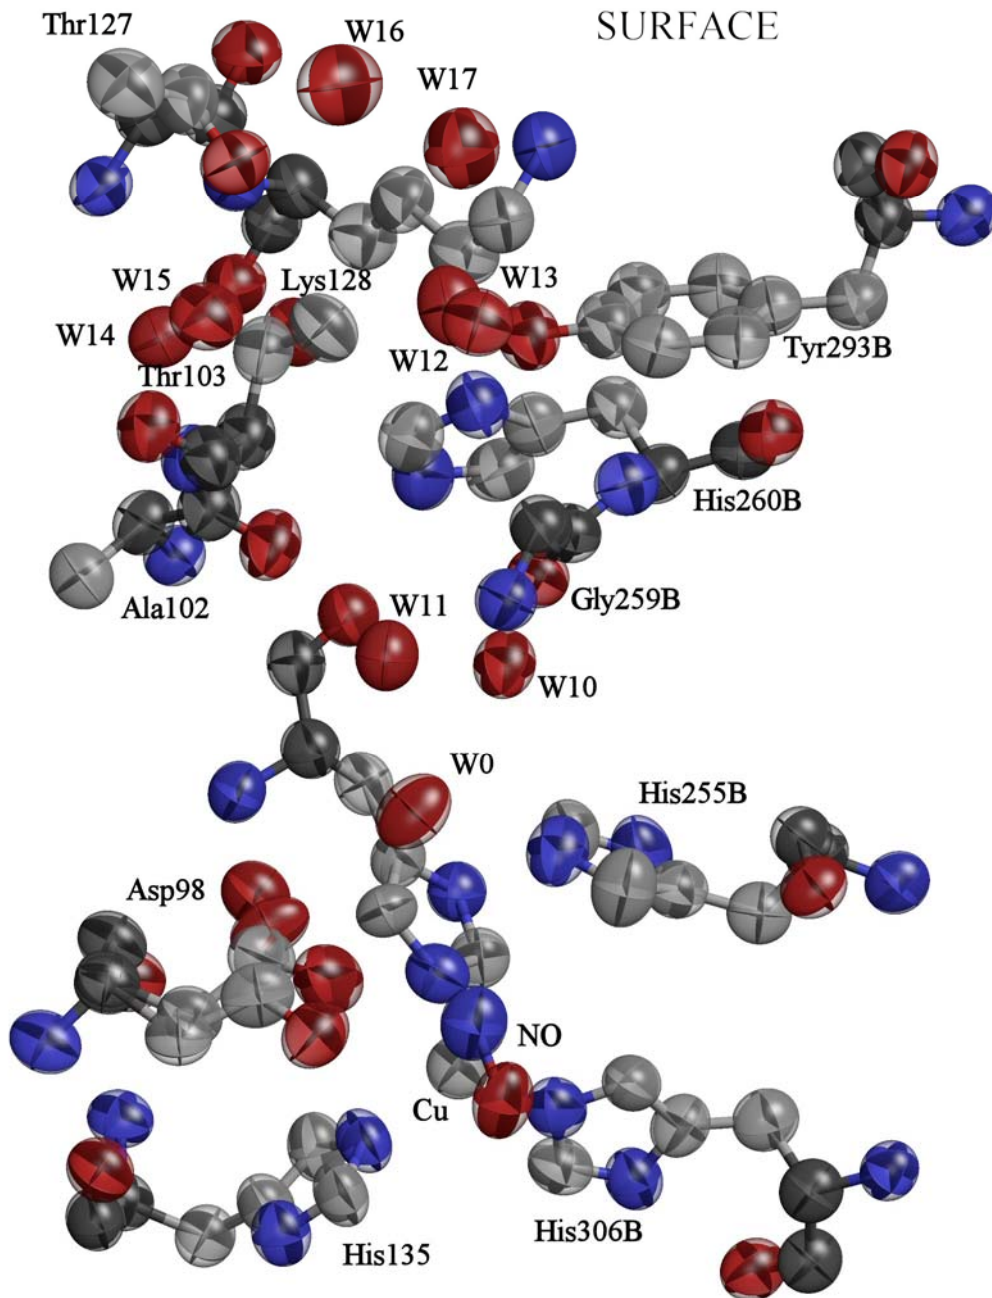

Supplement: pnas_0504207102_1.pdf [file pnas_0504207102_1.pdf]

(a) AcNiR

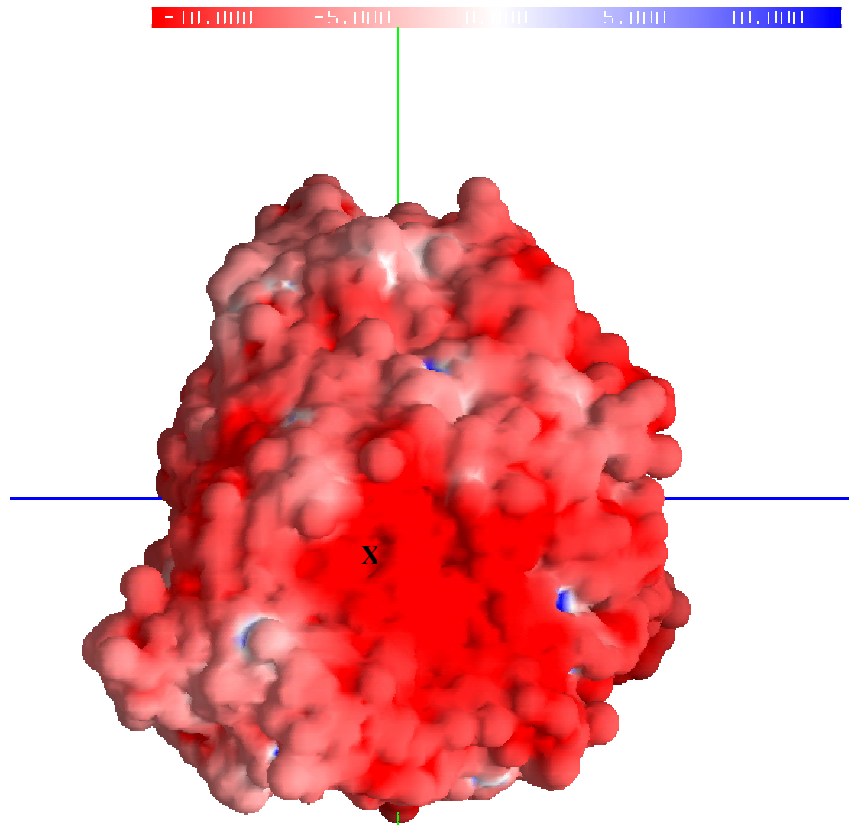

(b) AxNiR

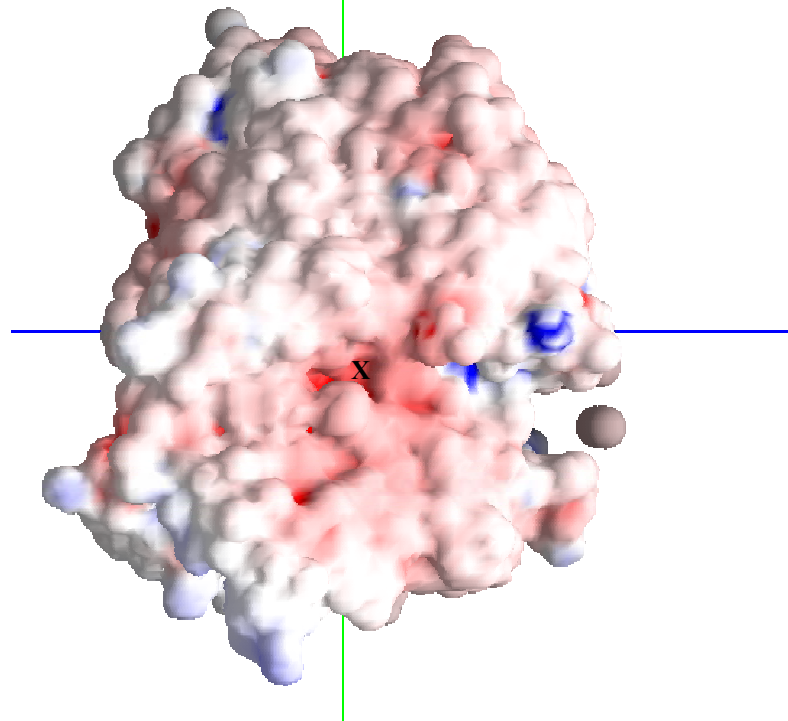

Supplement: pnas_0504207102_2.pdf [file pnas_0504207102_2.pdf]
